# Supplementary material for: Interplay between the EMT transcription factors ZEB1 and ZEB2 regulates hematopoietic stem and progenitor cell differentiation and hematopoietic lineage fidelity
Source: PubMed Central journal article supplement (PMC8489726; doi:10.1371/journal.pbio.3001394), 2021-09-22
Supplement: pbio.3001394.s021.pdf [file pbio.3001394.s021.pdf]

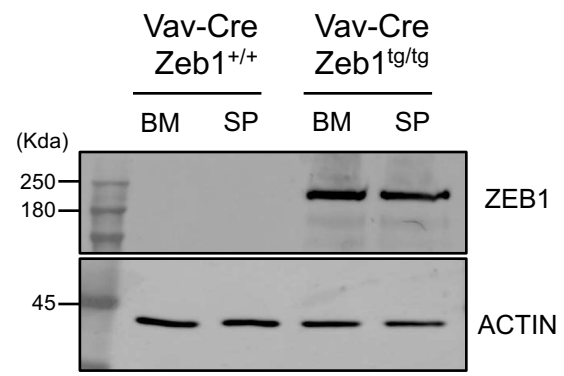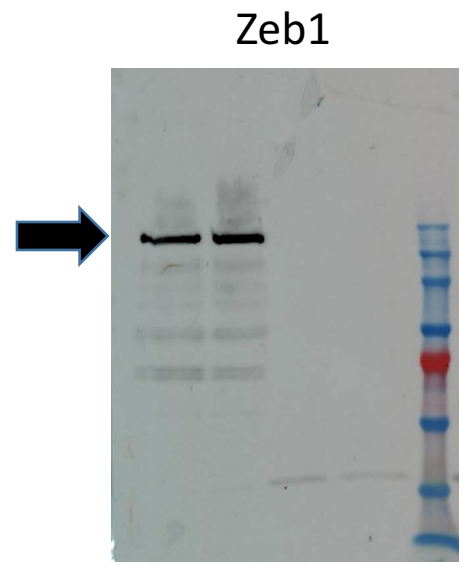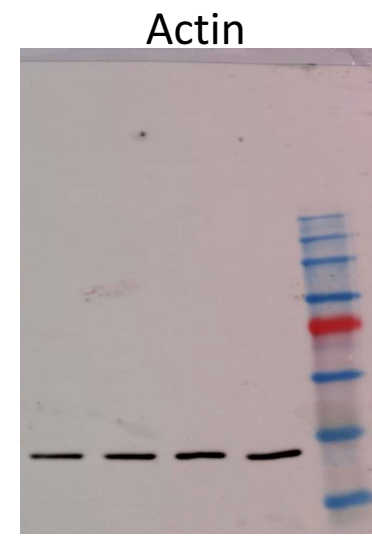

**Fig 8 D**

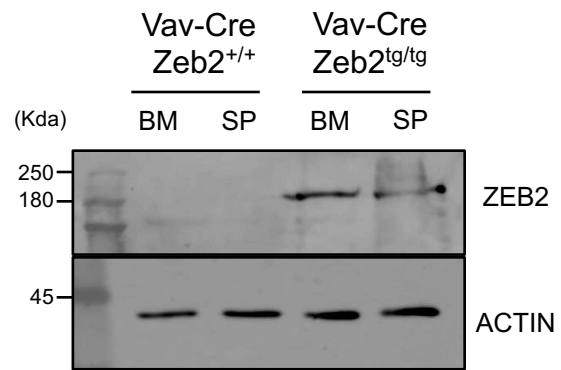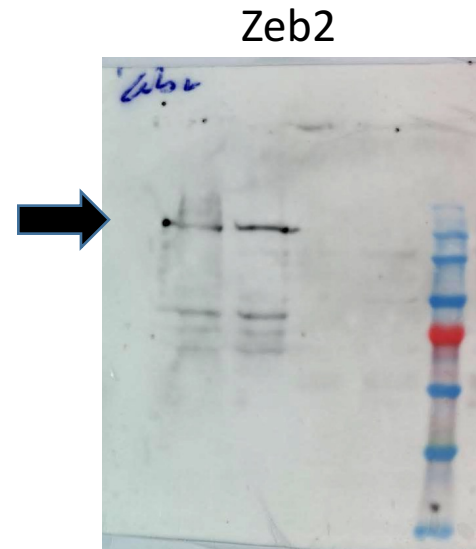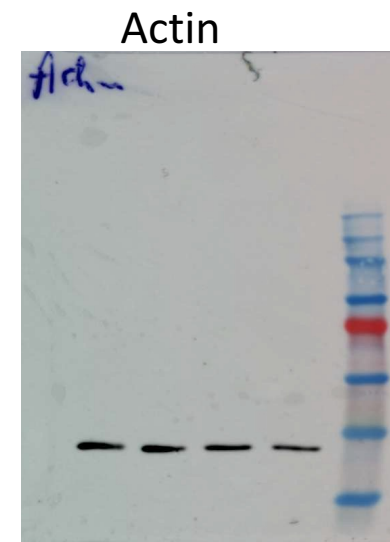

S9 Fig A
