# Supplementary material for: Interplay between the EMT transcription factors ZEB1 and ZEB2 regulates hematopoietic stem and progenitor cell differentiation and hematopoietic lineage fidelity
Source: PLoS Biol. 2021 Sep 22;19(9):e3001394. doi: 10.1371/journal.pbio.3001394 (PMC8489726; doi:10.1371/journal.pbio.3001394)
Supplement: S1 Table — BM cells from Zeb1 null CD45.2+ (Zeb1Δ/Δ) mice or Zeb1 heterozygous CD45.2+ cells (Zeb1+/Δ) were mixed with equal numbers of control CD45.1+ BM cells and used to reconstitute lethally irradiated CD45.1+ mice. Numbers depict the percentage or donor and competitor cells in each experiment. BM, bone marrow. (XLSX) [file pbio.3001394.s013.xlsx]

## Sheet: A-overall chimerism 
control
	competitor (CD45.1)			donor (CD45.2)
BM	40.8028	55.0793	60.4971	59.1972	44.9207	39.5029
PB	53.1612	48.0105	52.3983	46.8388	51.9895	47.6017
SP	63.5127	57.8449	63.6861	36.4873	42.1551	36.3139
fl/+
	competitor (CD45.1)			donor (CD45.2)
BM	47.9575	54.7777	46.3784	52.0425	45.2223	53.6216
PB	68.023	71.8553	63.4846	31.977	28.1447	36.5154
SP	80.3571	82.6087	74.281	19.6429	17.3913	25.719
fl/fl
	competitor (CD45.1)			donor (CD45.2)
BM	96	94.3378	96.0024	4	5.66222	3.99758
PB	97.4215	96.6154	96.1138	2.5785	3.38458	3.88621
SP	98.0791	98.5091	98.0053	1.92089	1.49088	1.99474

## Sheet: B-BM lineages
BM stem cells 45.1/45.2-control
	competitor (CD45.1)			donor (CD45.2)
B cells	45.7888	39.8355	46.2799	54.2112	60.1645	53.7201
T cells	53.7234	60.7692	62.0848	46.2766	39.2308	37.9152
Myeloid cells	40.4933	63.9344	66.8731	59.5067	36.0656	33.1269
Neutrophils	37.3581	62.0761	65.4244	62.6419	37.9239	34.5756
Mono/Mac	51.2146	69.3089	71.7635	48.7854	30.6911	28.2365
BM mature cells 45.1/45.2-fl/+
	competitor (CD45.1)			donor (CD45.2)
B cells	57.4857	69.6711	56.0533	42.5143	30.3289	43.9467
T cells	77.4863	79.6117	77.2004	22.5137	20.3883	22.7996
Myeloid cells	43.8398	49.6454	44.0609	56.1602	50.3546	55.9391
Neutrophils	42.5051	48.783	41.6667	57.4949	51.217	58.3333
Mono/Mac	48.407	52.5253	52.4772	51.593	47.4747	47.5228
BM mature cells 45.1/45.2-fl/fl
	competitor (CD45.1)			donor (CD45.2)
B cells	94.5476	97.1452	94.723	5.45244	2.85482	5.27704
T cells	97.8891	96.0709	96.0301	2.11088	3.92908	3.96989
Myeloid cells	98.5002	93.5005	96.261	1.4998	6.49955	3.73898
Neutrophils	98.3989	93.301	95.9959	1.60113	6.69905	4.00405
Mono/Mac	98.8266	94.0404	97.0716	1.17338	5.9596	2.92836

## Sheet: C-PB lineages
PB mature cells 45.1/45.2-control
	competitor (CD45.1)			donor (CD45.2)
B cells	50.6	38.5	47.2	48.9	61	52.3
T cells	63.9	67.5	73	35	31.9	26.4
Myeloid cells	51.6	61.8	55.9	47.8	37.9	43.8
Neutrophils	49.6	57.8	51.8	50.3	41.9	48.2
Mono/Mac	53.9	65.1	60.2	44.7	34.7	39.2
PB mature cells 45.1/45.2-fl/+
	competitor (CD45.1)			donor (CD45.2)
B cells	66.2	71.8	60	33.1	27.9	39.7
T cells	91.9	91.3	90.9	7.84	8.63	8.95
Myeloid cells	52.6	53.9	50.8	47.2	45.9	49.1
Neutrophils	41.1	48.6	40.7	58.8	51.3	59.2
Mono/Mac	58.5	56.1	64.3	41.3	43.7	35.6
PB mature cells 45.1/45.2-fl/fl
	competitor (CD45.1)			donor (CD45.2)
B cells	96.1	97.9	96.1	3.8	2.01	3.73
T cells	99.6	98.8	98.8	0.057	0.29	0.26
Myeloid cells	97.5	89.6	91.9	2.52	10.4	8.05
Neutrophils	96.6	85.6	87.7	3.41	14.3	12.3
Mono/Mac	98.2	94.2	95.7	1.78	5.76	4.06
